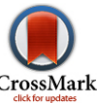

## Correction

# Correction: *In Vivo* Genotoxicity Assessment of Titanium Dioxide Nanoparticles by *Allium cepa* Root Tip Assay at High Exposure Concentrations

The PLOS ONE Staff

There are errors in the Author Contributions. The correct contributions are: Conceived and designed the experiments: SP, AM. Performed the experiments: SP, SD, NJ, JJ, PTC. Analyzed the data: SP, AM, NC. Contributed reagents/materials/analysis tools: AM, AMR, NC. Wrote the paper: SD, SP, NJ, AM

## Reference

1. Pakrashi S, Jain N, Dalai S, Jayakumar J, Chandrasekaran P T, et al. (2014) *In Vivo* Genotoxicity Assessment of Titanium Dioxide Nanoparticles by *Allium cepa* Root Tip Assay at High Exposure Concentrations. PLoS ONE 9(2): e87789. doi:10.1371/journal.pone.0087789

**Citation:** The PLOS ONE Staff (2014) Correction: *In Vivo* Genotoxicity Assessment of Titanium Dioxide Nanoparticles by *Allium cepa* Root Tip Assay at High Exposure Concentrations. PLoS ONE 9(5): e98828. doi:10.1371/journal.pone.0098828

**Published:** May 20, 2014

**Copyright:** © 2014 The PLOS ONE Staff. This is an open-access article distributed under the terms of the Creative Commons Attribution License, which permits unrestricted use, distribution, and reproduction in any medium, provided the original author and source are credited.
